# Essential New Titles for Mental Health Professionals!

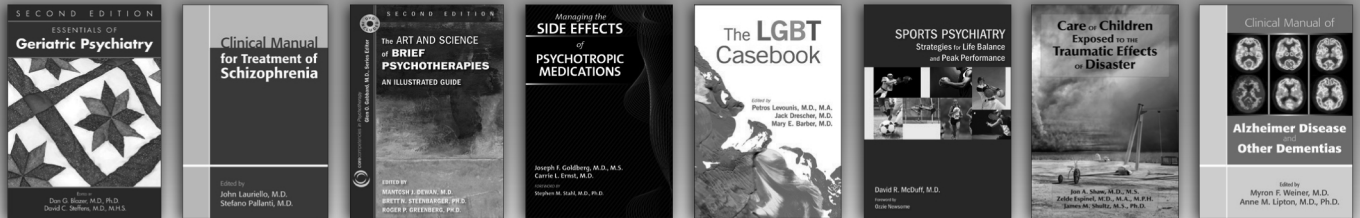

## Essentials of Geriatric Psychiatry, Second Edition

Edited by **Dan G. Blazer, M.D., Ph.D.,** and **David C. Steffens, M.D., M.H.S.**

*Essentials of Geriatric Psychiatry*, Second Edition thoroughly covers not only a wide range of important mental disorders in the elderly, but also the so-called “normal” effects of aging that result in biological, social, and behavioral changes in older adults.

2012 • 436 pages • ISBN 978-1-58562-413-3 • Paperback • \$95.00  
Item #62413

## Clinical Manual for Treatment of Schizophrenia

Edited by **John Lauriello, M.D.,** and **Stefano Pallanti, M.D.**

*Clinical Manual for Treatment of Schizophrenia* provides a uniquely multicultural and supremely patient-centered perspective on schizophrenia’s core symptoms, its psychosocial effects, and its psychopharmacological and psychotherapeutic management.

2012 • 523 pages • ISBN 978-1-58562-394-5 • Paperback • \$79.00  
Item #62394

## The Art and Science of Brief Psychotherapies

**An Illustrated Guide, Second Edition  
Core Competencies in Psychotherapy**

Edited by **Mantosh J. Dewan, M.D.,**  
**Brett N. Steenbarger, Ph.D.,** and  
**Roger P. Greenberg, Ph.D.**

Series Editor: **Glen O. Gabbard, M.D.**

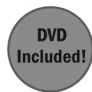

The groundbreaking text *The Art and Science of Brief Psychotherapies*, addressing a treatment modality in increasing demand, has now been released in a new edition, thoroughly updated, revised, and expanded to include rich material for learning and teaching the “how-to” of brief psychotherapy.

2012 • 372 pages • ISBN 978-1-58562-396-9 • Paperback • \$79.00  
Item #62396

## Managing the Side Effects of Psychotropic Medications

Joseph F. Goldberg, M.D., M.S., and Carrie L. Ernst, M.D.  
Foreword by Stephen M. Stahl, M.D., Ph.D.

This excellent and unique work deconstructs complex scenarios into understandable components, providing invaluable guidance to clinicians as they consider options for managing adverse drug effects that range from the common to the most serious. Cowritten by a research psychopharmacologist and a consultation-liaison psychiatrist, this book fills a void in the literature, helping mental health practitioners assess the risks and benefits of specific psychotropic medications and undertake strategies for managing adverse effects.

2012 • 532 pages • ISBN 978-1-58562-402-7 • Paperback • \$65.00  
Item #62402

## The LGBT Casebook

Edited by **Petros Levounis, M.D., M.A.,**  
**Jack Drescher, M.D.,** and **Mary Barber, M.D.**

*The LGBT Casebook* provides a general overview and roadmap for clinicians new to treating LGBT individuals, and it deepens and updates knowledge for those already seeing these patients in their practices. *The LGBT Casebook* helps clinicians, residents, social workers, nurses, and other mental health professionals better address the unique needs of the LGBT community during both assessment and treatment.

2012 • 324 pages • ISBN 978-1-58562-421-8 • Paperback • \$62.00  
Item #62421

## Sports Psychiatry Strategies for Life Balance and Peak Performance

David R. McDuff, M.D.  
Foreword by Ozzie Newsome

McDuff offers insights that are down-to-earth and informed by his many years of experience treating players at the highest level. Practical and compassionate, *Sports Psychiatry: Strategies for Life Balance and Peak Performance* will be of enormous help to readers inside and outside the sports arena.

2012 • 288 pages • ISBN 978-1-58562-415-7 • Paperback • \$59.00  
Item #62415

## Care of Children Exposed to the Traumatic Effects of Disaster

Jon A. Shaw, M.D., M.S., Zelde Espinel, M.D., M.A., M.P.H., and James M. Shultz, M.S., Ph.D.

*Care of Children Exposed to the Traumatic Effects of Disaster* is designed to provide professional and volunteer disaster responders, including community members, who routinely interact with children with the tools they need to support, intervene, and identify children who need additional help overcoming the traumatic effects of extreme events.

2012 • 243 pages • ISBN 978-1-58562-426-3 • Paperback • \$54.00  
Item #62426

## Clinical Manual of Alzheimer Disease and Other Dementias

Edited by **Myron F. Weiner, M.D.,** and  
**Anne M. Lipton, M.D., Ph.D.**

In *Clinical Manual of Alzheimer Disease and Other Dementias*, practicing psychiatrists and neurologists address neuropsychiatric assessment, diagnosis, and treatment of a wide range of clinical neuropsychiatric conditions, including Alzheimer disease and traumatic brain injury.

2012 • 470 pages • ISBN 978-1-58562-422-5 • Paperback • \$69.00  
Item #62422

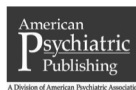

The First and Last Word in Psychiatry

[www.appi.org](http://www.appi.org)

Email: [appi@psych.org](mailto:appi@psych.org)  
Toll Free: 1-800-368-5777

Please use Priority Code AH1233 when ordering.

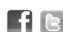

Source: http://focus.psychiatryonline.org/doi/suppl/10.1176/foc.2012.10.issue-2/suppl_file/advert.pdf
