# Read All About It!

Sign up for the Psychiatric News alert!

## PSYCHIATRIC NEWS alert

The Voice of the American Psychiatric Association and the Psychiatric Community

*Psychiatric News* has a new way to keep you informed between issues—a daily news service at [alert.psychiatricnews.org](http://alert.psychiatricnews.org).

Sign up to receive news alerts automatically through email and RSS feeds.

**Psychiatric News Alert** reports on breaking news on topics of importance to psychiatrists—such as clinical psychiatry, psychiatric research, legislative and regulatory updates, health policy, APA advocacy initiatives, and lifelong learning—and provides links to further information in *Psychiatric News*. Highlights also include major findings reported in APA's leading periodicals, the *American Journal of Psychiatry* and *Psychiatric Services*.

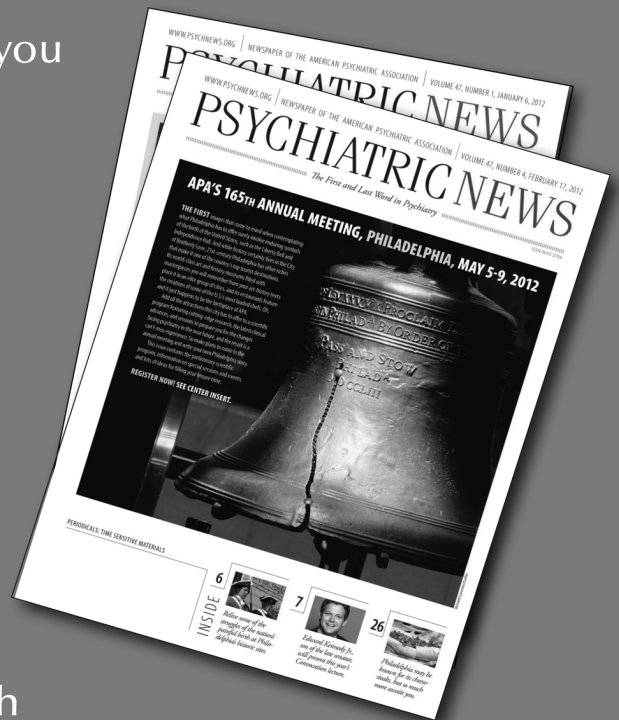

Sign up now at [alert.psychiatricnews.org](http://alert.psychiatricnews.org)

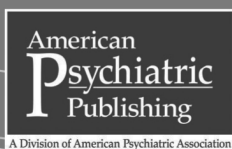

The *First and Last Word* in Psychiatry

[www.appi.org](http://www.appi.org) | [psychnews.org](http://psychnews.org) • [appi@psych.org](mailto:appi@psych.org) • 1-800-368-5777

Find us on  and .

Priority Code AH1212
