# FOCUS

THE JOURNAL OF LIFELONG LEARNING IN PSYCHIATRY

## Schizophrenia

Guest Editors, *Peter F. Buckley, M.D.*  
*Brian J. Miller, M.D., Ph.D., M.P.H.*

### IN CLINICAL SYNTHESIS:

Is Relapse in Schizophrenia an Immune-Mediated Effect?

*Brian J. Miller, M.D., Ph.D., M.P.H.*  
*Peter F. Buckley, M.D.*

Antipsychotic Medication Nonadherence:  
Risk Factors and Remedies

*Oliver Freudenreich, M.D.*  
*Corinne Cather, Ph.D.*

Managing Medication Effects on Body Weight:  
Do Behavioral Interventions Work?

*Joseph C. Ratliff, Ph.D.*  
*Erin L. Reutenauer, B.A.*  
*Genk Tek, M.D.*

Performance in Practice Physician Practice Assessment Tool  
for the Care of Adults With Schizophrenia

*Farifteh F. Duffy, Ph.D. et al.*

AND INFLUENTIAL PUBLICATIONS...
